# Supplementary material for: Efficient filter-in-centrifuge separation of low-concentration bacteria from blood
Source: Royal Society of Chemistry journal article supplement (doi:10.1039/d3lc00594a), 2023-01-01
Supplement: d3lc00594a1.xlsx [file d3lc00594a1.xlsx]

## Sheet: Bacteria recovery RBC rejection
	Bacteria at 100 CFU/mL concentration	K. pneumoniae	E. coli	S. aureus			Bacteria at 1000 CFU/mL concentration	K. pneumoniae	E. coli	S. aureus
	Total bacteria recovery (%)						Total bacteria recovery (%)
	Data point 1	33.9	29.6	29.1			Data point 1	35.3	39.4	29.3
	Data point 2	26.1	38.3	30.5			Data point 2	28.3	32.3	33.7
	Data point 3	27.8	32.4	27.6			Data point 3	37.3	33	31.3
	Fraction of Lymphoprep in medium (%)	0	50	75	100		Filter inclination angle α (°)	27	48	63	72
	Relative bacteria recvoery (%)						Relative bacteria recvoery (%)
	Data point 1	31.8	21.3	63.3	28.2		Data point 1	64	59.4	63.3	67.6
	Data point 2	22.1	27.2	75.5	31.4		Data point 2	40.7	72.4	75.5	76.3
	Data point 3	14.2	33.7	55	55.5		Data point 3	43.7	51	55	44.8
	Filter pore size (μm)	1	2	3			Centrifuging RCF (g) & time (min)	2000 & 60	4500 & 30	4500 & 60	4500 & 90
	Relative bacteria recvoery (%)						Relative bacteria recvoery (%)
	Data point 1	0	20.4	63.3			Data point 1	48	51.6	63.3	68.6
	Data point 2	0	23.9	75.5			Data point 2	35.6	48	75.5	65.1
	Data point 3	0	28.2	55			Data point 3	28.4	34.8	55	55.6
	Pore size (μm) of filter dealing volumes of blood (mL)	2.0 & 0.4	2.0 & 1.0	3.0 & 0.4	3.0 & 1.0		Recovering E.coli from tubes after centrifuging	Centrifuge tubes	Printed tubes
	RBC rejection (%)						Bacteria counts (CFU)
	Data point 1	99.79	99.85	99.33	99.29		Data point 1	1974	924
	Data point 2	99.8	99.82	99.42	99.44		Data point 2	1722	1176
	Data point 3	99.78	99.83	99.29	99.52		Data point 3	1428	882

## Sheet: Hb light absorbance
Well number in the plate	A1	A2	A3	A4	A5	A6	A7	A8	A9	A10	A11	A12	B1	B2	B3	B4	B5	B6	B7	B8	B9	B10	B11	B12	C1	C2	C3	C4	C5	C6	C7	C8	C9	C10	C11	C12	D1	D2	D3	D4	D5	D6	D7	D8	D9	D10	D11	D12	E1
Sample concentration in the well (A.U.) , and the highest (original) is marked as '10000'.	10000	5000	2500	1250	625	312.5	156.25	78.125	39.0625	19.5312	9.76562	4.88281	10000	5000	2500	1250	625	312.5	156.25	78.125	39.0625	19.5312	9.76562	4.88281	8000	4000	2000	1000	500	250	125	62.5	31.25	15.625	7.8125	3.90625	8000	4000	2000	1000	500	250	125	62.5	31.25	15.625	7.8125	3.90625	6000
2.0 μm pore size filter, 0.4 mL processed blood, retentate sample
Sample 1 absorbance (A.U.)
500 nm	1.5925	0.9318	0.3593	0.1552	0.1003	0.0714	0.056	0.0465	0.0418	0.0386	0.0386	0.0386	1.6843	0.9663	0.3439	0.1557	0.0999	0.0701	0.0563	0.0466	0.0427	0.0398	0.0385	0.0379	1.3387	0.6794	0.227	0.1306	0.0865	0.0638	0.051	0.044	0.0409	0.0389	0.041	0.0376	1.31	0.7062	0.2318	0.1317	0.088	0.0641	0.0511	0.0453	0.0418	0.0393	0.0384	0.0375	0.8629
410 nm	4	3.7129	2.8129	1.9517	1.1349	0.6284	0.349	0.1987	0.1248	0.0853	0.0663	0.0541	3.7903	3.8524	2.8062	1.9644	1.1355	0.6234	0.3533	0.203	0.1275	0.087	0.0664	0.054	4	3.4142	2.5078	1.6483	0.9129	0.4995	0.2813	0.1663	0.1076	0.0779	0.063	0.0513	4	3.4801	2.5188	1.6376	0.9291	0.5039	0.2836	0.1664	0.1077	0.0772	0.0603	0.0511	3.6848
Sample 2 absorbance (A.U.)
500 nm	1.7776	0.971	0.3411	0.1594	0.1032	0.0724	0.057	0.0477	0.0422	0.0414	0.0395	0.0385	2.3981	0.9772	0.3436	0.1628	0.1048	0.0728	0.0565	0.0476	0.0415	0.0394	0.039	0.0376	1.4485	0.6688	0.2354	0.1389	0.0891	0.0645	0.0522	0.0461	0.0413	0.0394	0.039	0.0383	1.3364	0.6929	0.235	0.1369	0.0906	0.065	0.0525	0.0455	0.0417	0.0399	0.0388	0.0382	1.0254
410 nm	4	3.8201	2.7883	1.983	1.1584	0.6353	0.357	0.2055	0.1281	0.0893	0.0671	0.0546	4	3.8536	2.8153	2.0186	1.1951	0.6566	0.3685	0.2137	0.1348	0.0915	0.069	0.0553	4	3.404	2.5519	1.7357	0.9487	0.5172	0.2926	0.1748	0.1111	0.0798	0.0623	0.0523	4	3.4632	2.5547	1.6962	0.962	0.5253	0.2933	0.1736	0.1112	0.0797	0.0624	0.0524	3.9316
Sample 3 absorbance (A.U.)
500 nm	1.5162	0.8812	0.307	0.1439	0.094	0.0684	0.0544	0.0465	0.0411	0.0413	0.0395	0.0382	1.4351	0.8634	0.3098	0.1465	0.0958	0.0677	0.0539	0.0461	0.0412	0.0391	0.0576	0.0373	1.2504	0.6164	0.2088	0.1255	0.0878	0.0605	0.0501	0.0439	0.0409	0.0398	0.0389	0.0379	1.127	0.6289	0.2086	0.1226	0.083	0.0616	0.0499	0.0449	0.0415	0.0398	0.0387	0.0383	0.9291
410 nm	4	3.6434	2.6501	1.8133	1.0294	0.5592	0.3196	0.1841	0.1182	0.0854	0.0653	0.0539	4	3.6363	2.6765	1.8426	1.052	0.5737	0.3225	0.1914	0.1231	0.0851	0.0836	0.0531	4	3.284	2.3951	1.5516	0.8372	0.4567	0.2637	0.1588	0.1046	0.0772	0.0625	0.0522	4	3.3042	2.389	1.5052	0.8392	0.4637	0.2604	0.1612	0.1042	0.0766	0.061	0.0521	3.8428
2.0 μm pore size filter, 0.4 mL processed blood, filtrate sample
Sample 1 absorbance (A.U.)
500 nm	0.0393	0.0398	0.0397	0.0375	0.0377	0.0379	0.0377	0.0374	0.0361	0.0376	0.0373	0.037	0.0409	0.0393	0.0387	0.0375	0.0381	0.0374	0.0372	0.0368	0.0357	0.0362	0.0372	0.0365	0.041	0.0397	0.0384	0.0378	0.0368	0.0363	0.0366	0.0365	0.0365	0.0369	0.0374	0.037	0.0409	0.0401	0.0391	0.0385	0.038	0.0371	0.0362	0.0371	0.037	0.0387	0.0369	0.037	0.0414
410 nm	0.0526	0.0505	0.0475	0.045	0.0436	0.0428	0.0422	0.0416	0.0412	0.0418	0.0416	0.0416	0.0532	0.05	0.0468	0.0442	0.0434	0.0422	0.0416	0.0413	0.0407	0.0407	0.0413	0.0408	0.0527	0.0494	0.046	0.0441	0.0429	0.0411	0.0409	0.0414	0.0408	0.0411	0.0416	0.0412	0.0534	0.0501	0.0467	0.0448	0.0435	0.0418	0.0411	0.041	0.0411	0.0428	0.0415	0.0417	0.0559
Sample 2 absorbance (A.U.)
500 nm	0.0396	0.0397	0.0398	0.0377	0.0377	0.0381	0.04	0.038	0.0364	0.0378	0.0375	0.0372	0.0414	0.0393	0.0388	0.0374	0.038	0.0374	0.0373	0.037	0.0361	0.0364	0.0374	0.0367	0.0412	0.0397	0.0386	0.0378	0.0363	0.0364	0.0367	0.0363	0.0366	0.0369	0.0375	0.0369	0.0411	0.0404	0.0395	0.0385	0.0381	0.0373	0.0366	0.0373	0.0372	0.0373	0.0372	0.0374	0.0399
410 nm	0.0538	0.0506	0.0484	0.0457	0.0442	0.0436	0.0458	0.0426	0.0421	0.0423	0.0421	0.0419	0.0544	0.0501	0.0473	0.0447	0.0438	0.0427	0.0421	0.042	0.0414	0.0412	0.0419	0.0412	0.0534	0.0497	0.0467	0.0447	0.0432	0.0417	0.0415	0.0418	0.0412	0.0416	0.042	0.0412	0.0543	0.0508	0.0477	0.0453	0.0438	0.0424	0.0417	0.0416	0.0416	0.0417	0.0418	0.0421	0.0511
Sample 3 absorbance (A.U.)
500 nm	0.0389	0.0397	0.0397	0.0377	0.0374	0.0378	0.0381	0.0379	0.0361	0.0377	0.0374	0.037	0.0408	0.0392	0.0388	0.0375	0.0378	0.0372	0.0371	0.0368	0.0356	0.0364	0.0387	0.0366	0.0413	0.0399	0.0384	0.0378	0.0363	0.0364	0.0366	0.0367	0.0365	0.037	0.0376	0.0369	0.0418	0.04	0.0391	0.0383	0.038	0.0374	0.0361	0.037	0.0372	0.0372	0.037	0.0371	0.0405
410 nm	0.0525	0.05	0.0475	0.045	0.0431	0.0427	0.0426	0.0419	0.0412	0.0417	0.0417	0.0415	0.0533	0.0497	0.0468	0.044	0.043	0.0419	0.0415	0.0412	0.0406	0.0408	0.0429	0.0408	0.053	0.0488	0.0459	0.044	0.0426	0.041	0.0408	0.0413	0.0408	0.0411	0.0418	0.041	0.0547	0.05	0.0467	0.0446	0.0435	0.042	0.0408	0.0409	0.0412	0.0411	0.0413	0.0417	0.0509
2.0 μm pore size filter, 1.0 mL processed blood, retentate sample
Sample 1 absorbance (A.U.)
500 nm	3.3833	1.9259	0.8886	0.3418	0.2069	0.1305	0.0907	0.0649	0.0532	0.0446	0.0412	0.0389	3.3075	1.8863	0.8708	0.3429	0.2029	0.1274	0.086	0.0639	0.0506	0.0441	0.0405	0.0393	2.8841	1.5183	0.5548	0.2848	0.1686	0.1079	0.0774	0.0577	0.0482	0.0424	0.0406	0.0382	2.9392	1.5601	0.5665	0.2889	0.1749	0.1096	0.0768	0.058	0.0493	0.043	0.0407	0.0391	1.9396
410 nm	4	4	3.9696	2.9999	2.3837	1.5428	0.8969	0.503	0.2989	0.1722	0.1083	0.0775	4	4	3.978	3.0303	2.384	1.5127	0.8593	0.4817	0.2757	0.1668	0.1093	0.0766	4	4	3.5423	2.8402	2.0565	1.2307	0.7051	0.3781	0.2204	0.1328	0.093	0.068	4	4	3.5827	2.8627	2.1191	1.2554	0.6959	0.3884	0.2278	0.1355	0.0942	0.0691	4
Sample 2 absorbance (A.U.)
500 nm	3.165	1.9521	0.8548	0.3348	0.1975	0.1252	0.0865	0.0623	0.052	0.0436	0.0406	0.0397	3.3952	1.8921	0.8465	0.3343	0.1965	0.126	0.0847	0.0619	0.0493	0.0436	0.0409	0.0387	2.7714	1.5498	0.5546	0.2853	0.1651	0.1065	0.0751	0.0575	0.0475	0.0426	0.0406	0.0385	3.2714	1.6155	0.5561	0.2826	0.166	0.1096	0.0757	0.0576	0.0484	0.0433	0.0406	0.0396	2.2234
410 nm	4	4	3.9323	2.9654	2.306	1.4718	0.8397	0.4628	0.2689	0.1581	0.1034	0.0744	4	4	3.9204	2.9981	2.324	1.4896	0.8345	0.4612	0.2634	0.1567	0.1033	0.0742	4	4	3.5418	2.8292	2.0341	1.1926	0.6626	0.3691	0.2113	0.1303	0.0893	0.0673	4	4	3.5667	2.8338	2.0479	1.2042	0.6785	0.3726	0.2152	0.134	0.0897	0.0677	4
Sample 3 absorbance (A.U.)
500 nm	3.4171	1.8067	0.8167	0.3033	0.1859	0.1132	0.0814	0.0589	0.0489	0.0421	0.0403	0.0384	3.2884	1.7791	0.7868	0.2999	0.1769	0.111	0.0768	0.0585	0.0471	0.0423	0.0394	0.0377	2.6247	1.4358	0.5062	0.253	0.1493	0.0978	0.069	0.0536	0.0465	0.0411	0.04	0.0377	2.5346	1.4466	0.4941	0.2507	0.1525	0.099	0.0708	0.0549	0.0466	0.0416	0.04	0.0388	1.926
410 nm	4	4	3.8402	2.8614	2.1679	1.3033	0.7365	0.406	0.2274	0.1344	0.0929	0.0687	4	4	3.8511	2.8797	2.1353	1.2689	0.7011	0.3875	0.2155	0.1295	0.0926	0.0649	4	4	3.4262	2.7071	1.8253	1.05	0.5925	0.316	0.1848	0.1136	0.081	0.0617	4	4	3.4262	2.6942	1.862	1.0627	0.5806	0.3261	0.1898	0.1165	0.0832	0.0632	4
2.0 μm pore size filter, 1.0 mL processed blood, filtrate sample
Sample 1 absorbance (A.U.)
500 nm	0.0402	0.041	0.0396	0.0378	0.0369	0.0372	0.0375	0.0369	0.0371	0.0366	0.037	0.0362	0.0412	0.0387	0.0381	0.0404	0.0372	0.0374	0.0371	0.0368	0.0363	0.0365	0.0367	0.0365	0.0415	0.0401	0.0384	0.0385	0.0376	0.0365	0.0363	0.0366	0.0371	0.0366	0.0371	0.0366	0.0428	0.0393	0.0389	0.0439	0.0375	0.0357	0.0368	0.0368	0.0372	0.0368	0.037	0.0367	0.0399
410 nm	0.0592	0.0535	0.0489	0.0457	0.0436	0.0427	0.0422	0.0419	0.0414	0.0424	0.0418	0.0414	0.0602	0.053	0.0489	0.0482	0.0439	0.0424	0.0416	0.0411	0.041	0.0408	0.041	0.0413	0.0576	0.0522	0.0476	0.0462	0.0427	0.041	0.0405	0.0408	0.0412	0.041	0.0413	0.0412	0.0596	0.0518	0.0479	0.0518	0.0432	0.0414	0.041	0.0406	0.0412	0.0409	0.0413	0.041	0.0541
Sample 2 absorbance (A.U.)
500 nm	0.0418	0.0393	0.0399	0.0391	0.0388	0.0379	0.0378	0.0441	0.0368	0.0355	0.0369	0.0372	0.0433	0.0408	0.0387	0.0393	0.0376	0.0372	0.0372	0.0368	0.0375	0.0369	0.0369	0.037	0.0419	0.0401	0.0393	0.037	0.0369	0.0379	0.0369	0.036	0.0367	0.0365	0.0372	0.0368	0.0425	0.0414	0.0392	0.0383	0.0376	0.037	0.0358	0.0412	0.0375	0.037	0.0371	0.0368	0.0397
410 nm	0.0579	0.0529	0.0498	0.0477	0.0454	0.0439	0.0433	0.0504	0.043	0.0421	0.0423	0.0421	0.0623	0.0549	0.0492	0.0477	0.0446	0.0429	0.0424	0.0418	0.0421	0.0418	0.0421	0.0415	0.0584	0.0516	0.0487	0.0449	0.0432	0.0436	0.042	0.0409	0.0416	0.0416	0.0417	0.0414	0.0587	0.0533	0.0483	0.0456	0.0435	0.0425	0.0418	0.046	0.0419	0.0416	0.0418	0.0415	0.0529
Sample 3 absorbance (A.U.)
500 nm	0.0422	0.0409	0.0404	0.0375	0.0368	0.0373	0.0375	0.0367	0.0372	0.0356	0.0367	0.0361	0.0515	0.0399	0.0383	0.0376	0.0376	0.0375	0.0371	0.0369	0.0364	0.0368	0.0367	0.0365	0.0417	0.0405	0.0383	0.0366	0.0383	0.0367	0.0373	0.0372	0.0371	0.0366	0.0372	0.0366	0.0427	0.0406	0.0391	0.0381	0.0375	0.0361	0.0368	0.037	0.0373	0.0369	0.037	0.0367	0.0399
410 nm	0.0624	0.0531	0.0493	0.0456	0.044	0.0432	0.0426	0.0422	0.0417	0.0416	0.0419	0.0415	0.0646	0.0534	0.0478	0.0452	0.0449	0.0428	0.042	0.0415	0.0413	0.0413	0.0413	0.0414	0.0563	0.0524	0.0473	0.0443	0.0437	0.0418	0.0421	0.0418	0.0417	0.0413	0.0416	0.0414	0.0584	0.053	0.0483	0.0452	0.0435	0.0422	0.0416	0.0414	0.0419	0.0415	0.0417	0.0414	0.0525
3.0 μm pore size filter, 0.4 mL processed blood, retentate sample
Sample 1 absorbance (A.U.)
500 nm	1.5213	0.902	0.3959	0.1521	0.0986	0.0706	0.0545	0.0461	0.043	0.0386	0.0379	0.0383	2.0485	0.8222	0.4029	0.1552	0.1003	0.0728	0.0561	0.0467	0.0408	0.0393	0.0389	0.0375	1.4943	0.6584	0.2742	0.1335	0.0847	0.0623	0.0507	0.0441	0.041	0.0389	0.0387	0.0374	1.2446	0.7117	0.2705	0.1281	0.0849	0.0628	0.0511	0.0451	0.0415	0.0426	0.0405	0.0404	1.2416
410 nm	4	3.7276	2.7264	1.8654	1.0966	0.5954	0.3315	0.1919	0.1195	0.0808	0.0642	0.0535	4	3.6443	2.7766	1.9211	1.1165	0.6316	0.3512	0.2045	0.1277	0.0887	0.0692	0.055	4	3.3499	2.4595	1.5834	0.8503	0.454	0.2595	0.1558	0.1032	0.0719	0.0604	0.0508	4	3.4595	2.4555	1.5593	0.8525	0.4635	0.2632	0.1515	0.1025	0.1193	0.0828	0.0647	4
Sample 2 absorbance (A.U.)
500 nm	1.6217	0.8682	0.3897	0.1469	0.096	0.0694	0.0557	0.0472	0.0414	0.0408	0.0396	0.0387	2.094	0.8922	0.3949	0.1484	0.0974	0.0692	0.0546	0.0457	0.041	0.0391	0.0395	0.037	1.513	0.6572	0.2532	0.1264	0.0854	0.0611	0.0498	0.0441	0.0407	0.039	0.0388	0.0378	1.2442	0.6991	0.2644	0.1278	0.0854	0.0632	0.0507	0.0448	0.0417	0.0398	0.0388	0.0381	0.764
410 nm	4	3.6672	2.7137	1.8195	1.0367	0.5767	0.3266	0.1892	0.1203	0.083	0.065	0.0546	4	3.7036	2.7284	1.8552	1.0722	0.5903	0.3283	0.1917	0.123	0.0857	0.0666	0.0526	4	3.3537	2.417	1.5512	0.8382	0.4582	0.2603	0.1564	0.1022	0.0743	0.0585	0.0497	4	3.4343	2.4427	1.5491	0.8665	0.4815	0.2673	0.1606	0.1043	0.0754	0.0603	0.0511	3.5411
Sample 3 absorbance (A.U.)
500 nm	1.5069	0.8172	0.3679	0.1461	0.0987	0.0716	0.0562	0.0466	0.0426	0.0393	0.039	0.0374	1.6231	0.8228	0.3645	0.1474	0.097	0.0695	0.0536	0.0469	0.0409	0.0392	0.0379	0.0373	1.2977	0.6482	0.2385	0.124	0.0844	0.0622	0.0506	0.0445	0.0416	0.0394	0.0387	0.0375	1.3371	0.6511	0.2511	0.1268	0.0831	0.0612	0.0507	0.0441	0.0409	0.039	0.0383	0.0378	0.9865
410 nm	4	3.5666	2.6447	1.7993	1.0724	0.6049	0.3464	0.2009	0.1247	0.0865	0.0678	0.0554	4	3.6443	2.6918	1.8407	1.0678	0.5829	0.3228	0.19	0.1169	0.0826	0.0644	0.0538	4	3.3186	2.3527	1.5276	0.8478	0.473	0.2763	0.1603	0.1046	0.0764	0.0606	0.0516	4	3.3069	2.4131	1.5409	0.8417	0.4594	0.2585	0.1522	0.1017	0.074	0.0589	0.0509	3.9721
3.0 μm pore size filter, 0.4 mL processed blood, filtrate sample
Sample 1 absorbance (A.U.)
500 nm	0.0426	0.0406	0.0406	0.0384	0.0388	0.0387	0.0379	0.0372	0.0373	0.036	0.0368	0.038	0.044	0.0413	0.0397	0.0382	0.0377	0.0378	0.0375	0.0372	0.0379	0.0379	0.0371	0.0371	0.0427	0.0409	0.0386	0.0375	0.0374	0.0367	0.0366	0.036	0.0371	0.0366	0.0372	0.0369	0.0438	0.0412	0.0393	0.0385	0.0373	0.0371	0.036	0.0374	0.0374	0.0369	0.0372	0.0367	0.0404
410 nm	0.0688	0.0631	0.0547	0.0492	0.0468	0.0458	0.044	0.0438	0.0437	0.0428	0.0426	0.0433	0.0733	0.0626	0.0545	0.0494	0.0465	0.0446	0.0434	0.0425	0.0432	0.0432	0.0428	0.042	0.0677	0.0594	0.0523	0.0476	0.0449	0.0436	0.0425	0.0417	0.0428	0.0427	0.0425	0.0422	0.0681	0.0588	0.0524	0.0482	0.0456	0.0442	0.0427	0.0428	0.0428	0.0425	0.0429	0.0423	0.0592
Sample 2 absorbance (A.U.)
500 nm	0.0414	0.0417	0.0406	0.0379	0.0374	0.0378	0.0388	0.0373	0.0371	0.038	0.0724	0.0366	0.0424	0.0395	0.0378	0.0377	0.0391	0.0387	0.0371	0.0374	0.0361	0.0367	0.0371	0.0393	0.0425	0.0402	0.0386	0.0366	0.0379	0.0374	0.0369	0.0364	0.0378	0.0374	0.0376	0.0377	0.0441	0.0403	0.0394	0.0388	0.0378	0.0363	0.0371	0.0375	0.0373	0.0372	0.0377	0.0375	0.0398
410 nm	0.0687	0.0587	0.0531	0.0482	0.0462	0.0447	0.0449	0.0436	0.0426	0.0448	0.0856	0.0427	0.0686	0.0577	0.0521	0.0476	0.0491	0.0447	0.0427	0.0428	0.0418	0.0416	0.0423	0.045	0.0656	0.0562	0.0501	0.0464	0.0443	0.0435	0.0425	0.042	0.0429	0.0429	0.0427	0.0431	0.0664	0.0566	0.0514	0.0477	0.045	0.0435	0.0426	0.0428	0.0427	0.0425	0.043	0.0427	0.057
Sample 3 absorbance (A.U.)
500 nm	0.0414	0.0414	0.0408	0.0384	0.0376	0.0386	0.0463	0.038	0.0369	0.0395	0.0381	0.038	0.0441	0.0407	0.0404	0.0395	0.0382	0.0377	0.0374	0.0368	0.0368	0.0365	0.0372	0.0371	0.043	0.0405	0.0386	0.0381	0.0369	0.0369	0.0367	0.0365	0.0368	0.037	0.0375	0.0372	0.045	0.0411	0.0402	0.0387	0.0383	0.0373	0.0366	0.0375	0.0372	0.0381	0.0373	0.0384	0.0411
410 nm	0.0696	0.0615	0.0541	0.0494	0.046	0.0451	0.0509	0.0433	0.043	0.0446	0.0432	0.0432	0.0725	0.0619	0.0536	0.0496	0.0461	0.0444	0.0431	0.0425	0.043	0.042	0.0421	0.0422	0.0667	0.0579	0.0514	0.0473	0.0452	0.0431	0.0421	0.0425	0.0418	0.042	0.0423	0.0419	0.0701	0.0587	0.0526	0.0479	0.0454	0.0431	0.0423	0.0423	0.042	0.0428	0.0422	0.0434	0.0602
3.0 μm pore size filter, 1.0 mL processed blood, retentate sample
Sample 1 absorbance (A.U.)
500 nm	3.8166	1.9668	0.9231	0.3887	0.2266	0.1365	0.0899	0.064	0.052	0.0438	0.0417	0.039	3.2989	1.9172	0.9172	0.3881	0.2212	0.1353	0.0882	0.063	0.0511	0.0437	0.0404	0.0386	3.1587	1.4606	0.5314	0.2905	0.1708	0.1078	0.0746	0.0569	0.048	0.042	0.0405	0.0385	3.5208	1.5185	0.5576	0.3002	0.1769	0.1093	0.075	0.058	0.05	0.0442	0.0404	0.0393	2.4072
410 nm	4	4	4	3.1196	2.477	1.6329	0.9017	0.4855	0.2705	0.1556	0.1023	0.0743	4	4	4	3.1504	2.498	1.6296	0.8874	0.4865	0.2677	0.1571	0.1056	0.0728	4	4	3.536	2.8446	2.0776	1.2166	0.673	0.3565	0.2038	0.1235	0.0875	0.065	4	4	3.5977	2.8973	2.1606	1.2672	0.6831	0.374	0.2367	0.1402	0.0942	0.069	4
Sample 2 absorbance (A.U.)
500 nm	3.2473	2.0541	0.8509	0.3522	0.2075	0.1286	0.0877	0.065	0.0509	0.0436	0.0417	0.0392	3.571	2.0087	0.843	0.3537	0.2049	0.1278	0.0863	0.0624	0.0509	0.0438	0.0403	0.0388	2.6585	1.5214	0.5751	0.2934	0.1729	0.1091	0.0782	0.0581	0.0492	0.0424	0.0406	0.0385	2.9002	1.58	0.5746	0.2965	0.1731	0.1123	0.0771	0.0581	0.049	0.0425	0.0405	0.0393	2.2444
410 nm	4	4	3.9814	3.0265	2.3849	1.5306	0.8696	0.4669	0.2567	0.1546	0.1021	0.0734	4	4	3.9795	3.0636	2.4065	1.5437	0.8664	0.4817	0.2712	0.1614	0.1077	0.075	4	4	3.5905	2.8654	2.1087	1.2592	0.7093	0.3778	0.2188	0.132	0.0905	0.0672	4	4	3.6014	2.8827	2.1279	1.2574	0.689	0.3789	0.2189	0.1314	0.09	0.0672	4
Sample 3 absorbance (A.U.)
500 nm	3.5079	2.0059	0.8195	0.3273	0.1935	0.1209	0.0831	0.0614	0.0506	0.043	0.0407	0.0386	3.882	1.9956	0.812	0.3325	0.1924	0.1214	0.0815	0.0611	0.0498	0.0432	0.0399	0.0381	2.6315	1.5295	0.5453	0.2752	0.1634	0.1035	0.0736	0.0562	0.0478	0.0421	0.0404	0.0379	2.9174	1.5694	0.5505	0.2811	0.1652	0.1035	0.0733	0.0561	0.0475	0.0432	0.04	0.0391	2.2816
410 nm	4	4	3.9053	2.9492	2.2932	1.4355	0.8049	0.4393	0.2459	0.147	0.0974	0.071	4	4	3.9464	2.9955	2.318	1.4636	0.7924	0.4423	0.2506	0.15	0.1013	0.0717	4	4	3.5218	2.7984	1.9993	1.167	0.6567	0.3537	0.2033	0.1261	0.0872	0.0643	4	4	3.5358	2.8205	2.0425	1.1823	0.6449	0.3561	0.2075	0.1278	0.0867	0.065	4
3.0 μm pore size filter, 1.0 mL processed blood, filtrate sample
Sample 1 absorbance (A.U.)
500 nm	0.0488	0.0445	0.0411	0.0382	0.0387	0.0381	0.0385	0.0372	0.0377	0.0365	0.0376	0.0366	0.053	0.0422	0.0398	0.0383	0.0372	0.0383	0.0373	0.036	0.0376	0.0368	0.0369	0.0373	0.0474	0.0423	0.039	0.038	0.0382	0.0372	0.0366	0.0372	0.0404	0.0369	0.0373	0.037	0.0495	0.0426	0.0394	0.0388	0.0388	0.0364	0.0364	0.0386	0.0377	0.0372	0.0371	0.0373	0.0439
410 nm	0.1058	0.0905	0.0706	0.0555	0.0513	0.0482	0.0463	0.0446	0.0437	0.0438	0.0435	0.0428	0.1144	0.0878	0.0702	0.0567	0.0512	0.0478	0.0452	0.0432	0.0438	0.0426	0.043	0.0432	0.097	0.0784	0.0652	0.0548	0.0497	0.0462	0.0439	0.0435	0.047	0.0431	0.0426	0.0429	0.1018	0.082	0.0654	0.0553	0.0511	0.0466	0.0444	0.0451	0.0438	0.0431	0.0431	0.0427	0.0865
Sample 2 absorbance (A.U.)
500 nm	0.0523	0.0462	0.0423	0.0383	0.0381	0.0385	0.0383	0.0379	0.0365	0.038	0.0377	0.0373	0.054	0.0459	0.041	0.0383	0.0385	0.0376	0.0376	0.0369	0.0358	0.0364	0.0376	0.0366	0.0507	0.0449	0.0398	0.0383	0.0372	0.037	0.0366	0.037	0.0367	0.0371	0.0375	0.0369	0.0516	0.0449	0.0406	0.0389	0.0384	0.0378	0.0369	0.0372	0.0373	0.0372	0.0373	0.0372	0.0454
410 nm	0.1086	0.0854	0.0687	0.0569	0.0507	0.0473	0.045	0.0435	0.0427	0.0428	0.0425	0.0421	0.1099	0.0851	0.0689	0.0563	0.0508	0.0462	0.0441	0.0428	0.0418	0.0415	0.0422	0.0412	0.0966	0.0786	0.0648	0.0539	0.0488	0.0446	0.0429	0.0427	0.0417	0.0419	0.0421	0.0412	0.1044	0.0799	0.066	0.0539	0.0493	0.0456	0.0432	0.0423	0.0421	0.0417	0.042	0.0418	0.0802
Sample 3 absorbance (A.U.)
500 nm	0.0509	0.0466	0.0417	0.0383	0.038	0.0384	0.0383	0.0379	0.0363	0.0379	0.0376	0.0373	0.0527	0.0448	0.0408	0.0382	0.0386	0.0374	0.0374	0.0373	0.0357	0.0364	0.0374	0.0366	0.0506	0.0433	0.0396	0.0385	0.0367	0.0366	0.0367	0.0367	0.0369	0.0369	0.038	0.0375	0.0509	0.0444	0.0406	0.039	0.0385	0.0378	0.037	0.0372	0.0373	0.0374	0.0375	0.0375	0.0459
410 nm	0.102	0.0815	0.067	0.0579	0.0497	0.0468	0.045	0.0435	0.0425	0.0428	0.0425	0.0421	0.1035	0.0812	0.0677	0.0557	0.0504	0.0458	0.0439	0.0435	0.0418	0.0416	0.0422	0.0413	0.0955	0.0754	0.0632	0.0544	0.048	0.0442	0.0428	0.043	0.0421	0.0419	0.0427	0.0419	0.098	0.0791	0.0642	0.0551	0.0492	0.0454	0.0433	0.0425	0.0422	0.0421	0.0425	0.0424	0.0814
Volumes of the samples (mL)
2.0 μm pore size filter, 0.4 mL processed blood, retentate sample
Sample 1: 5.8
Sample 2: 5.9
Sample 3: 6.0
2.0 μm pore size filter, 0.4 mL processed blood, filtrate sample
Sample 1: 18.0
Sample 2: 18.6
Sample 3: 17.8
2.0 μm pore size filter, 1.0 mL processed blood, retentate sample
Sample 1: 6.7
Sample 2: 5.6
Sample 3: 5.9
2.0 μm pore size filter, 1.0 mL processed blood, filtrate sample
Sample 1: 17.6
Sample 2: 18.0
Sample 3: 17.8
3.0 μm pore size filter, 0.4 mL processed blood, retentate sample
Sample 1: 5.0
Sample 2: 5.2
Sample 3: 5.0
3.0 μm pore size filter, 0.4 mL processed blood, filtrate sample
Sample 1: 19.6
Sample 2: 19.2
Sample 3: 19.6
3.0 μm pore size filter, 1.0 mL processed blood, retentate sample
Sample 1: 5.5
Sample 2: 6.4
Sample 3: 6.8
3.0 μm pore size filter, 1.0 mL processed blood, filtrate sample
Sample 1: 18.6
Sample 2: 17.6
Sample 3: 17.6
[truncated: 47 more columns]
